# Supplementary material for: Genomic Analysis of Two MDR Isolates of Salmonella enterica Serovar Infantis from a Spanish Hospital Bearing the blaCTX-M-65 Gene with or without fosA3 in pESI-like Plasmids
Source: MDPI journal article supplement (doi:10.3390/antibiotics11060786), 2022-06-09
Supplement: s1 [file s1]

## Supplementary Material

### Genomic analysis of two MDR isolates of *Salmonella enterica* serovar Infantis from a Spanish hospital bearing the *bla*<sub>CTX-M-65</sub> gene with and without *fosA3* in pESI-like plasmids

**Table S1.** Accession numbers of the genomes of two cefotaxime resistance isolates of *Salmonella enterica* serovar Infantis, and parameters related to the quality of the assemblies

| Isolate <sup>a</sup> | kmer | Contigs | N50     | Longest contig (bp) | Total bp in contigs | Contigs > 1 kb | Library     | Coverage | GenBank accession number |
|----------------------|------|---------|---------|---------------------|---------------------|----------------|-------------|----------|--------------------------|
| HUMV 13-6278         | 93   | 88      | 245,837 | 1,195,887           | 5,000,585           | 44             | 516 +/- 130 | 26x      | JAICDN000000000          |
| HUMV 15-5476         | 91   | 86      | 245,896 | 1,195,313           | 4,998,779           | 44             | 525 +/- 130 | 22x      | JAICDM000000000          |

<sup>a</sup>, HUMV, "Hospital Universitario Marqués de Valdecillas", Cantabria, Santander, Spain. Isolates are designated with the initials of the hospital, followed by the last two numbers of the year of recovery-serial number.

**Table S2.** Origin and accession numbers of the genomes of *Salmonella enterica* serovar Infantis isolates used for phylogenetic analysis in the present study

| Isolate      | Sample <sup>a</sup> | Country         | Year of isolation | <i>bla</i> <sub>CTX-M</sub> /<br><i>fosA3</i> <sup>b</sup> | GenBank/ENA<br>accession no. <sup>c</sup> | Reference |
|--------------|---------------------|-----------------|-------------------|------------------------------------------------------------|-------------------------------------------|-----------|
| 119944       | Human feces         | Israel          | 2008              | - / -                                                      | GCA_000506925.1                           | [1]       |
| MRS-16/01939 | Broiler flock       | Austria         | 2020              | - / -                                                      | SAMN19328299                              | [2]       |
| MRS-17/00712 | Broiler flock       | Austria         | 2020              | - / -                                                      | SAMN19328300                              | [2]       |
| 17-01817     | Human feces         | Germany         | 2017              | <i>bla</i> <sub>CTX-M-1</sub> / -                          | ERX4702755 <sup>c</sup>                   | [3]       |
| 17-04725     | Human feces         | Germany         | 2017              | <i>bla</i> <sub>CTX-M-1</sub> / -                          | ERX4702767 <sup>c</sup>                   | [3]       |
| 18-01586     | na                  | Germany         | 2018              | <i>bla</i> <sub>CTX-M-1</sub> / -                          | ERX470278 <sup>c</sup>                    | [3]       |
| 18-01982     | Human feces         | Germany         | 2018              | <i>bla</i> <sub>CTX-M-1</sub> / -                          | ERX4702792 <sup>c</sup>                   | [3]       |
| 18-02671     | Human feces         | Germany         | 2018              | <i>bla</i> <sub>CTX-M-1</sub> / -                          | ERX4702799 <sup>c</sup>                   | [3]       |
| 18-03381     | Human feces         | Germany         | 2018              | <i>bla</i> <sub>CTX-M-1</sub> / -                          | ERX4702804 <sup>c</sup>                   | [3]       |
| 18-04022     | Human feces         | Germany         | 2018              | <i>bla</i> <sub>CTX-M-1</sub> / -                          | ERX4702810 <sup>c</sup>                   | [3]       |
| 18-06875     | na                  | Germany         | 2018              | <i>bla</i> <sub>CTX-M-1</sub> / -                          | ERX4702828*                               | [3]       |
| 18-06974     | Human feces         | Germany         | 2018              | <i>bla</i> <sub>CTX-M-1</sub> / -                          | ERX4702829 <sup>c</sup>                   | [3]       |
| 19-00103     | Human feces         | Germany         | 2019              | <i>bla</i> <sub>CTX-M-1</sub> / -                          | ERX4702832 <sup>c</sup>                   | [3]       |
| 19-01785     | Human feces         | Germany         | 2019              | <i>bla</i> <sub>CTX-M-1</sub> / -                          | ERX4702844 <sup>c</sup>                   | [3]       |
| 19-03124     | Human feces         | Germany         | 2019              | <i>bla</i> <sub>CTX-M-1</sub> / -                          | ERX4702861 <sup>c</sup>                   | [3]       |
| 19-04093     | Human feces         | Germany         | 2019              | <i>bla</i> <sub>CTX-M-1</sub> / -                          | ERX4702868 <sup>c</sup>                   | [3]       |
| 19-04501     | na                  | Germany         | 2019              | <i>bla</i> <sub>CTX-M-1</sub> / -                          | ERX4702875 <sup>c</sup>                   | [3]       |
| 19-04642     | Human feces         | Germany         | 2019              | <i>bla</i> <sub>CTX-M-1</sub> / -                          | ERX4702878 <sup>c</sup>                   | [3]       |
| 16092401-41  | Broiler chicken     | Italy           | 2016              | <i>bla</i> <sub>CTX-M-1</sub> / -                          | ERS2521096 <sup>c</sup>                   | [4]       |
| 16092401-42  | Broiler chicken     | Italy           | 2016              | <i>bla</i> <sub>CTX-M-1</sub> / -                          | ERS2521097 <sup>c</sup>                   | [4]       |
| 16072017     | Broiler chicken     | Italy           | 2016              | - / -                                                      | ERS2030111 <sup>c</sup>                   | [4]       |
| 17095712-68  | Broiler meat        | Italy           | 2017              | - / -                                                      | ERS2521098 <sup>c</sup>                   | [4]       |
| 14026835     | Human (na)          | Italy           | 2014              | <i>bla</i> <sub>CTX-M-65</sub> / +                         | ERR1014119 <sup>c</sup>                   | [5]       |
| 1091300903   | Human feces         | The Netherlands | 2013              | <i>bla</i> <sub>CTX-M-65</sub> / +                         | ERS2030077 <sup>c</sup>                   | [6]       |
| 1091400879   | Human (na)          | The Netherlands | 2014              | <i>bla</i> <sub>CTX-M-65</sub> / +                         | ERS2030079 <sup>c</sup>                   | [6]       |
| 1091401725   | Human feces         | The Netherlands | 2014              | <i>bla</i> <sub>CTX-M-65</sub> / +                         | ERS2030086 <sup>c</sup>                   | [6]       |

|               |                          |                     |      |                                    |                         |            |
|---------------|--------------------------|---------------------|------|------------------------------------|-------------------------|------------|
| 1091600414    | Human (na)               | The Netherlands     | 2016 | <i>bla</i> <sub>CTX-M-65</sub> / + | ERS2030074 <sup>c</sup> | [6]        |
| 1091603069    | Human (na)               | The Netherlands     | 2017 | <i>bla</i> <sub>CTX-M-65</sub> / + | ERS2030068 <sup>c</sup> | [6]        |
| 91264         | Human (na)               | England and Wales   | 2015 | - / -                              | CP070301.1              | [7]        |
| N55391        | Chicken breast           | USA                 | 2014 | <i>bla</i> <sub>CTX-M-65</sub> / - | GCA_001931595.1         | [8]        |
| 18TX11CB22-S1 | Chicken breast           | USA                 | 2018 | <i>bla</i> <sub>CTX-M-65</sub> / - | CP082538 - CP082539     | [9]        |
| CVM N18S2085  | Chicken wings            | USA                 | 2018 | - / -                              | CP052776.1              | [10]       |
| CVM N18S2198  | Chicken breast           | USA                 | 2018 | <i>bla</i> <sub>CTX-M-65</sub> / - | CP082521 - CP082522     | [9]        |
| CVM N19S0949  | Chicken wings            | USA                 | 2019 | - / -                              | CP052780.1              | [10]       |
| CFSAN003307   | Creek water              | USA                 | 2011 | - / -                              | GCA_002863785.1         | [1]        |
| FSIS1502169   | Chicken ceca             | USA                 | 2015 | <i>bla</i> <sub>CTX-M-65</sub> / + | CP016406 - CP016407     | [8]        |
| FSIS1502916   | Comminuted chicken       | USA                 | 2015 | <i>bla</i> <sub>CTX-M-65</sub> / + | GCA_001931575.1         | [8]        |
| CVM44454      | Human (na)               | USA                 | 2014 | <i>bla</i> <sub>CTX-M-65</sub> / - | GCA_001931615.1         | [8]        |
| FARPER-219    | Chicken liver and spleen | Peru                | 2017 | <i>bla</i> <sub>CTX-M-65</sub> / + | GCA_006402875.1         | [11]       |
| CFSAN103796   | Cloacae swab             | Trinidad and Tobago | 2019 | <i>bla</i> <sub>CTX-M-65</sub> / - | GCA_012957765.2         | [12]       |
| TR01          | Poultry flock            | Turkey              | 2017 | - / -                              | CP040600.1              | [13]       |
| HUMV 13-6278  | Human feces              | Spain               | 2013 | <i>bla</i> <sub>CTX-M-65</sub> / - | JAICDN000000000         | This study |
| HUMV 15-5476  | Human feces              | Spain               | 2015 | <i>bla</i> <sub>CTX-M-65</sub> / + | JAICDM000000000         | This study |

<sup>a</sup>, na, information not available.

<sup>b</sup>, -, absent.

<sup>c</sup>, The raw reads of the genome sequence were retrieved from the ENA (European Nucleotide Archive; <http://www.ebi.ac.uk/ena>) and assembled by using VelvetOptimiser.pl script implemented in the “on line” version of PLACNETw (<https://omictools.com/placnet-tool>). When two accession numbers are indicated they correspond to the chromosome and the pESI-like plasmids of the isolate.

## References

1. Cohen, E, Rahav, G, and Gal-Mor, O. Genome Sequence of an Emerging *Salmonella enterica* Serovar Infantis and Genomic Comparison with Other *S. Infantis* Strains. *Genome Biol. Evol.* **2020**, 12(3): 151-159. doi: 10.1093/gbe/evaa048
2. Drauch, V.; Kornschober, C.; Palmieri, N.; Hess, M.; Hess, C. Infection dynamics of *Salmonella* Infantis strains displaying different genetic backgrounds - with or without pESI-like plasmid - vary considerably. *Emerg. Microbes. Infect.* **2021**, 10, 1471–1480, doi:10.1080/22221751.2021.1951124
3. Pietsch, M.; Simon, S.; Meinen, A.; Trost, E.; Banerji, S.; Pfeifer, Y.; Flieger, A. Third generation cephalosporin resistance in clinical non-typhoidal *Salmonella enterica* in Germany and emergence of *bla*<sub>CTX-M</sub>-harbouring pESI plasmids. *Microb. Genom.* **2021**, 7, doi:10.1099/mgen.0.000698
4. Carfora, V.; Alba, P.; Leekitcharoenphon, P.; Ballaro, D.; Cordaro, G.; Di Matteo, P.; Donati, V.; Ianzano, A.; Iurescia, M.; Stravino, F.; et al. Colistin Resistance Mediated by *mcr-1* in ESBL-Producing, Multidrug Resistant *Salmonella* Infantis in Broiler Chicken Industry, Italy (2016-2017). *Front. Microbiol.* **2018**, 9, 1880, doi: 10.3389/fmicb.2018.01880

5. Franco, A, Leekitcharoenphon, P, Feltrin, F, Alba, P, Cordaro, G, Iurescia, M, Tolli, R, D'Incau, M, Staffolani, M, Di Giannatale, E, Hendriksen, RS, and Battisti, A. Emergence of a Clonal Lineage of Multidrug-Resistant ESBL-Producing *Salmonella* Infantis Transmitted from Broilers and Broiler Meat to Humans in Italy between 2011 and 2014. *PLoS One*. **2015**, 10(12): e0144802. doi: 10.1371/journal.pone.0144802
6. Alba, P, Leekitcharoenphon, P, Carfora, V, Amoroso, R, Cordaro, G, Di Matteo, P, Ianzano, A, Iurescia, M, Diaconu, EL, Study Group, EN, Pedersen, SK, Guerra, B, Hendriksen, RS, Franco, A, and Battisti, A. Molecular epidemiology of *Salmonella* Infantis in Europe: insights into the success of the bacterial host and its parasitic pESI-like megaplasmid. *Microb. Genom.* **2020**, 6(5). doi: 10.1099/mgen.0.000365
7. Lee, WWY, Mattock, J, Greig, DR, Langridge, GC, Baker, D, Bloomfield, S, Mather, AE, Wain, JR, Edwards, AM, Hartman, H, Dallman, TJ, Chattaway, MA, and Nair, S. Characterization of a pESI-like plasmid and analysis of multidrug-resistant *Salmonella enterica* Infantis isolates in England and Wales. *Microb. Genom.* **2021**, 7(10). doi: 10.1099/mgen.0.000658
8. Tate, H, Folster, JP, Hsu, CH, Chen, J, Hoffmann, M, Li, C, Morales, C, Tyson, GH, Mukherjee, S, Brown, AC, Green, A, Wilson, W, Dessai, U, Abbott, J, Joseph, L, Haro, J, Ayers, S, McDermott, PF, and Zhao, S. Comparative Analysis of Extended-Spectrum- $\beta$ -Lactamase CTX-M-65-Producing *Salmonella enterica* Serovar Infantis Isolates from Humans, Food Animals, and Retail Chickens in the United States. *Antimicrob. Agents Chemother.* **2017**, 61(7). doi: 10.1128/AAC.00488-17
9. Li, C, Tyson, GH, Hsu, CH, Harrison, L, Strain, E, Tran, TT, Tillman, GE, Dessai, U, McDermott, PF, and Zhao, S. Long-Read Sequencing Reveals Evolution and Acquisition of Antimicrobial Resistance and Virulence Genes in *Salmonella enterica*. *Front. Microbiol.* **2021**, 12: 777817. doi: 10.3389/fmicb.2021.777817
10. Tyson, GH, Li, C, Harrison, LB, Martin, G, Hsu, CH, Tate, H, Tran, TT, Strain, E, and Zhao, S. A Multidrug-Resistant *Salmonella* Infantis Clone is Spreading and Recombining in the United States. *Microb. Drug Resist.* **2021**, 27(6): 792-799. doi: 10.1089/mdr.2020.0389
11. Vallejos-Sanchez, K, Tataje-Lavanda, L, Villanueva-Perez, D, Bendezu, J, Montalvan, A, Zimic-Peralta, M, Fernandez-Sanchez, M, and Fernandez-Diaz, M. Whole-Genome Sequencing of a *Salmonella enterica* subsp. *enterica* Serovar Infantis Strain Isolated from Broiler Chicken in Peru. *Microbiol. Resour. Announc.* **2019**, 8(43). doi: 10.1128/MRA.00826-19
12. Maguire, M, Khan, AS, Adesiyun, AA, Georges, K, and Gonzalez-Escalona, N. Genomic comparison of eight closed genomes of multidrug resistant *Salmonella enterica* strains isolated from broiler farms and processing plants in Trinidad and Tobago. *Front. Microbiol.* **2022**, 13, 863104. <https://doi.org/10.1101/2021.05.20.445003>.
13. Müstak, I.B.; Yardimci, H. Construction and in vitro characterisation of *aroA* defective (*aroAΔ*) mutant *Salmonella* Infantis. *Arch. Microbiol.* **2019**, 201, 1277-1284, doi: 10.1007/s00203-019-01694-0.

**Table S3.** Pairwise distance matrix calculated from SNP in the genomes of two *Salmonella enterica* serovar Infantis human isolates from a Spanish hospital and 41 isolates from other sources and countries.

|               | 1091300303 | 1091400879 | 1091401725 | 1091600414 | 1091603069 | 119944 | 14026835 | 16072017 | 1609240141 | 17-0181 | 17-04725 | 1709571268 | 18-01586 | 18-01582 | 18-02671 | 18-03381 | 18-04022 | 18-06875 | 18-06974 | 187X11C922-51 | 19-00103 | 19-01785 | 19-03124 | 19-04083 | 19-04501 | 19-04642 | 6092401-42 | 91264 | CFSAN030307 | CFSAN103796 | QVM44454 | QVM N1852085 | QVM N1852198 | QVM N1850849 | FARPER-219 | FSIS 1502169 | FSIS 1502916 | HUMW 13-6278 | HUMW 15-5476 | MRS-16/01899 | MRS-17/00712 | N55391 | TR01 |
|---------------|------------|------------|------------|------------|------------|--------|----------|----------|------------|---------|----------|------------|----------|----------|----------|----------|----------|----------|----------|---------------|----------|----------|----------|----------|----------|----------|------------|-------|-------------|-------------|----------|--------------|--------------|--------------|------------|--------------|--------------|--------------|--------------|--------------|--------------|--------|------|
| 1091300303    | 0          | 15         | 22         | 32         | 32         | 97     | 23       | 123      | 131        | 113     | 161      | 116        | 163      | 148      | 134      | 155      | 122      | 158      | 156      | 36            | 160      | 178      | 170      | 126      | 153      | 196      | 132        | 123   | 164         | 48          | 18       | 144          | 39           | 38           | 27         | 24           | 26           | 14           | 20           | 147          | 257          | 23     | 251  |
| 1091400879    | 15         | 0          | 17         | 27         | 27         | 94     | 22       | 120      | 128        | 110     | 158      | 113        | 160      | 146      | 131      | 152      | 119      | 155      | 153      | 31            | 157      | 175      | 167      | 123      | 150      | 193      | 129        | 120   | 161         | 43          | 13       | 141          | 34           | 33           | 22         | 19           | 21           | 11           | 17           | 144          | 254          | 18     | 248  |
| 1091401725    | 22         | 17         | 0          | 34         | 34         | 101    | 29       | 127      | 135        | 117     | 165      | 130        | 167      | 152      | 138      | 159      | 126      | 162      | 160      | 38            | 164      | 182      | 174      | 130      | 157      | 200      | 136        | 127   | 168         | 50          | 20       | 148          | 41           | 40           | 29         | 26           | 28           | 18           | 24           | 151          | 261          | 25     | 255  |
| 1091600414    | 32         | 27         | 34         | 0          | 0          | 111    | 39       | 137      | 145        | 127     | 175      | 140        | 177      | 162      | 148      | 169      | 136      | 172      | 170      | 48            | 174      | 192      | 184      | 140      | 167      | 210      | 146        | 137   | 178         | 60          | 30       | 158          | 51           | 50           | 39         | 36           | 38           | 28           | 34           | 161          | 271          | 35     | 265  |
| 1091603069    | 32         | 27         | 34         | 0          | 0          | 111    | 39       | 137      | 145        | 127     | 175      | 140        | 177      | 162      | 148      | 169      | 136      | 172      | 170      | 48            | 174      | 192      | 184      | 140      | 167      | 210      | 146        | 137   | 178         | 60          | 30       | 158          | 51           | 50           | 39         | 36           | 38           | 28           | 34           | 161          | 271          | 35     | 265  |
| 119944        | 97         | 94         | 101        | 111        | 111        | 0      | 100      | 112      | 118        | 100     | 148      | 113        | 150      | 135      | 123      | 142      | 108      | 145      | 143      | 115           | 147      | 165      | 157      | 113      | 140      | 183      | 119        | 110   | 151         | 127         | 97       | 131          | 118          | 117          | 106        | 108          | 108          | 98           | 99           | 134          | 246          | 102    | 238  |
| 14026835      | 25         | 22         | 29         | 39         | 39         | 100    | 0        | 126      | 134        | 116     | 164      | 119        | 166      | 151      | 137      | 158      | 125      | 161      | 159      | 43            | 163      | 181      | 173      | 129      | 156      | 199      | 135        | 126   | 167         | 55          | 25       | 147          | 46           | 45           | 34         | 31           | 33           | 21           | 27           | 150          | 260          | 30     | 254  |
| 16072017      | 123        | 120        | 127        | 137        | 137        | 112    | 126      | 0        | 72         | 54      | 174      | 17         | 176      | 161      | 149      | 168      | 63       | 171      | 169      | 141           | 173      | 191      | 183      | 139      | 166      | 209      | 73         | 136   | 177         | 153         | 123      | 157          | 144          | 143          | 132        | 129          | 131          | 119          | 125          | 160          | 272          | 128    | 264  |
| 16092401-41   | 131        | 128        | 135        | 145        | 145        | 118    | 134      | 72       | 0          | 28      | 180      | 73         | 182      | 167      | 155      | 174      | 35       | 177      | 175      | 149           | 177      | 197      | 187      | 145      | 172      | 213      | 43         | 142   | 183         | 161         | 131      | 163          | 152          | 151          | 140        | 137          | 139          | 127          | 131          | 166          | 276          | 136    | 270  |
| 17-0181       | 113        | 110        | 117        | 127        | 127        | 100    | 116      | 54       | 28         | 0       | 162      | 55         | 164      | 149      | 137      | 156      | 19       | 159      | 157      | 131           | 161      | 179      | 171      | 127      | 154      | 197      | 29         | 124   | 165         | 143         | 113      | 145          | 134          | 133          | 122        | 119          | 121          | 109          | 115          | 148          | 260          | 118    | 252  |
| 17-04725      | 161        | 158        | 165        | 175        | 175        | 148    | 164      | 174      | 180        | 162     | 0        | 175        | 128      | 91       | 101      | 98       | 171      | 123      | 121      | 179           | 125      | 143      | 137      | 125      | 118      | 161      | 181        | 122   | 119         | 191         | 161      | 83           | 182          | 181          | 170        | 167          | 169          | 157          | 163          | 194          | 242          | 166    | 238  |
| 17095712-68   | 126        | 123        | 130        | 140        | 140        | 113    | 129      | 17       | 73         | 55      | 175      | 0          | 177      | 162      | 150      | 169      | 64       | 172      | 170      | 144           | 174      | 192      | 184      | 140      | 167      | 210      | 74         | 137   | 178         | 156         | 126      | 158          | 147          | 146          | 135        | 132          | 134          | 122          | 128          | 161          | 273          | 131    | 265  |
| 18-01586      | 163        | 160        | 167        | 177        | 177        | 150    | 166      | 176      | 182        | 164     | 128      | 177        | 0        | 115      | 103      | 122      | 173      | 99       | 37       | 181           | 41       | 57       | 55       | 127      | 34       | 77       | 183        | 124   | 131         | 193         | 163      | 111          | 184          | 183          | 172        | 169          | 171          | 159          | 165          | 196          | 244          | 168    | 240  |
| 18-01582      | 148        | 145        | 152        | 162        | 162        | 135    | 151      | 161      | 167        | 149     | 91       | 162        | 115      | 0        | 88       | 13       | 158      | 110      | 108      | 166           | 112      | 130      | 124      | 112      | 105      | 148      | 168        | 109   | 106         | 178         | 148      | 74           | 169          | 168          | 157        | 154          | 156          | 144          | 150          | 181          | 229          | 153    | 225  |
| 18-02671      | 134        | 131        | 138        | 148        | 148        | 123    | 137      | 149      | 155        | 137     | 101      | 150        | 108      | 88       | 0        | 95       | 146      | 98       | 96       | 152           | 100      | 118      | 112      | 100      | 93       | 136      | 156        | 97    | 104         | 164         | 134      | 84           | 155          | 154          | 143        | 140          | 142          | 130          | 136          | 169          | 217          | 139    | 213  |
| 18-03381      | 155        | 152        | 159        | 169        | 169        | 142    | 158      | 168      | 174        | 156     | 98       | 169        | 122      | 13       | 95       | 0        | 165      | 117      | 115      | 173           | 119      | 137      | 131      | 119      | 112      | 155      | 175        | 116   | 113         | 185         | 155      | 81           | 176          | 175          | 164        | 161          | 163          | 151          | 157          | 188          | 236          | 160    | 232  |
| 18-04022      | 122        | 119        | 126        | 136        | 136        | 109    | 125      | 65       | 35         | 19      | 171      | 64         | 173      | 158      | 146      | 165      | 0        | 168      | 166      | 140           | 170      | 188      | 180      | 136      | 163      | 206      | 36         | 133   | 174         | 152         | 122      | 154          | 143          | 142          | 131        | 128          | 130          | 118          | 124          | 157          | 269          | 127    | 261  |
| 18-06875      | 158        | 155        | 162        | 172        | 172        | 145    | 161      | 171      | 177        | 159     | 123      | 172        | 39       | 110      | 98       | 117      | 168      | 0        | 10       | 176           | 14       | 52       | 28       | 122      | 7        | 50       | 178        | 119   | 126         | 188         | 158      | 106          | 179          | 178          | 167        | 164          | 166          | 154          | 160          | 191          | 239          | 163    | 235  |
| 18-06974      | 156        | 153        | 160        | 170        | 170        | 143    | 159      | 169      | 175        | 157     | 121      | 170        | 37       | 108      | 96       | 115      | 166      | 10       | 0        | 174           | 12       | 50       | 26       | 120      | 5        | 48       | 176        | 117   | 124         | 186         | 156      | 104          | 177          | 176          | 165        | 162          | 164          | 152          | 158          | 189          | 237          | 161    | 233  |
| 187X11C922-51 | 36         | 31         | 38         | 48         | 48         | 115    | 43       | 141      | 149        | 131     | 179      | 144        | 181      | 166      | 152      | 173      | 140      | 176      | 174      | 0             | 178      | 196      | 188      | 144      | 171      | 214      | 150        | 141   | 182         | 24          | 34       | 162          | 31           | 10           | 43         | 16           | 18           | 32           | 38           | 165          | 275          | 15     | 269  |
| 19-00103      | 160        | 157        | 164        | 174        | 174        | 147    | 163      | 173      | 177        | 161     | 125      | 174        | 41       | 112      | 100      | 119      | 170      | 14       | 12       | 178           | 0        | 54       | 26       | 124      | 9        | 44       | 180        | 121   | 123         | 190         | 160      | 108          | 181          | 180          | 169        | 166          | 168          | 156          | 160          | 191          | 237          | 165    | 237  |
| 19-01785      | 178        | 175        | 182        | 192        | 192        | 165    | 181      | 191      | 197        | 179     | 143      | 192        | 57       | 130      | 118      | 137      | 188      | 52       | 50       | 196           | 54       | 0        | 68       | 142      | 47       | 90       | 198        | 139   | 146         | 208         | 178      | 126          | 199          | 198          | 187        | 184          | 186          | 174          | 180          | 211          | 259          | 183    | 255  |
| 19-03124      | 170        | 167        | 174        | 184        | 184        | 157    | 173      | 183      | 187        | 171     | 137      | 184        | 55       | 124      | 112      | 131      | 180      | 28       | 26       | 188           | 26       | 68       | 0        | 136      | 23       | 50       | 190        | 133   | 140         | 200         | 170      | 120          | 191          | 190          | 179        | 176          | 178          | 166          | 170          | 203          | 251          | 175    | 249  |
| 19-04083      | 126        | 123        | 130        | 140        | 140        | 113    | 129      | 139      | 145        | 127     | 125      | 140        | 127      | 112      | 100      | 119      | 136      | 122      | 130      | 144           | 124      | 142      | 136      | 0        | 117      | 160      | 146        | 87    | 128         | 156         | 126      | 108          | 147          | 146          | 135        | 132          | 134          | 122          | 128          | 159          | 223          | 131    | 219  |
| 19-04501      | 153        | 150        | 157        | 167        | 167        | 140    | 156      | 166      | 172        | 154     | 118      | 167        | 34       | 105      | 95       | 112      | 163      | 7        | 5        | 171           | 9        | 47       | 23       | 117      | 0        | 45       | 173        | 114   | 121         | 183         | 153      | 101          | 174          | 173          | 162        | 159          | 161          | 149          | 155          | 186          | 234          | 158    | 230  |
| 19-04642      | 196        | 193        | 200        | 210        | 210        | 183    | 199      | 209      | 213        | 197     | 161      | 210        | 77       | 148      | 136      | 155      | 206      | 50       | 48       | 214           | 44       | 90       | 50       | 160      | 45       | 0        | 216        | 157   | 164         | 226         | 196      | 144          | 217          | 216          | 205        | 202          | 204          | 192          | 194          | 227          | 273          | 201    | 273  |
| 6092401-42    | 132        | 129        | 136        | 146        | 146        | 119    | 135      | 73       | 43         | 29      | 181      | 74         | 183      | 168      | 156      | 175      | 36       | 178      | 176      | 150           | 180      | 198      | 190      | 146      | 173      | 216      | 0          | 143   | 184         | 162         | 132      | 164          | 153          | 152          | 141        | 138          | 140          | 128          | 134          | 167          | 279          | 137    | 271  |
| 91264         | 123        | 120        | 127        | 137        | 137        | 110    | 126      | 136      | 142        | 124     | 122      | 137        | 124      | 109      | 97       | 116      | 133      | 119      | 117      | 141           | 121      | 139      | 133      | 87       | 114      | 157      | 143        | 0     | 125         | 153         | 123      | 105          | 144          | 143          | 132        | 129          | 131          | 119          | 125          | 156          | 220          | 128    | 216  |
| CFSAN030307   | 164        | 161        | 168        | 178        | 178        | 151    | 167      | 177      | 183        | 165     | 119      | 178        | 131      | 106      | 104      | 113      | 174      | 126      | 124      | 182           | 128      | 146      | 140      | 128      | 121      | 164      | 184        | 125   | 0           | 194         | 164      | 102          | 185          | 184          | 173        | 170          | 172          | 160          | 166          | 197          | 245          | 169    | 241  |
| CFSAN103796   | 48         | 43         | 50         | 60         | 60         | 127    | 55       | 153      | 161        | 143     | 191      | 156        | 195      | 178      | 164      | 185      | 152      | 188      | 186      | 24            | 190      | 208      | 200      | 156      | 183      | 226      | 162        | 153   | 194         | 0           | 46       | 174          | 43           | 26           | 55         | 28           | 30           | 44           | 50           | 177          | 287          | 27     | 281  |
| QVM44454      | 18         | 13         | 20         | 30         | 30         | 97     | 25       | 123      | 131        | 113     | 161      | 126        | 163      | 148      | 134      | 155      | 122      | 158      | 156      | 34            | 160      | 178      | 170      | 126      | 153      | 196      | 132        | 123   | 164         | 46          | 0        | 144          | 37           | 36           | 25         | 22           | 24           | 14           | 20           | 147          | 257          | 21     | 251  |
| QVM N1852085  | 144        | 141        | 148        | 158        | 158        | 131    | 147      | 157      | 163        | 145     | 83       | 158        | 111      | 74       | 84       | 81       | 154      | 106      | 104      | 162           | 108      | 126      | 120      | 108      | 101      | 144      | 164        | 105   | 102         | 174         | 144      | 0            | 165          | 164          | 153        | 150          | 152          | 140          | 146          | 177          | 225          | 149    | 221  |
| QVM N1852198  | 39         | 34         | 41         | 51         | 51         | 118    | 46       | 144      | 152        | 134     | 182      | 147        | 184      | 169      | 155      | 176      | 143      | 179      | 177      | 31            | 181      | 199      | 191      | 147      | 174      | 217      | 153        | 144   | 185         | 43          | 37       | 165          | 0            | 33           | 46         | 19           | 21           | 35           | 41           | 168          | 278          | 18     | 272  |
| CVM N1950949  | 38         | 33         | 40         | 50         | 50         | 117    | 45       |          |            |         |          |            |          |          |          |          |          |          |          |               |          |          |          |          |          |          |            |       |             |             |          |              |              |              |            |              |              |              |              |              |              |        |      |

**Table S4.** Oligonucleotides designed for this work and used for the assembly of the resistance regions (R1 and R2) of pESI-like plasmids found in *Salmonella enterica* serovar Infantis isolates from a Spanish hospital

| Primer name       | Sequence (5'-3')        |
|-------------------|-------------------------|
| <i>tauE</i> fam   | ACCTATAACGGAACCGATGACC  |
| IS1380 fam Flq    | GGTGTCGGGAAATTTTCGTTGAG |
| IS903B            | AGTGGCTAATCAGCGAATGACC  |
| <i>tonB</i>       | CGATATTCAGGTCAACGATGCC  |
| <i>fosA3.3</i>    | CAGGGATTGAATCATCTGACGC  |
| <i>fosA3.2</i>    | CAGTAAGCTGAACTAACCCGTC  |
| <i>fosA3.1</i>    | GACGGGTTAGTTCAGCTTACTG  |
| IS91 fam.1        | TGAAGTACTGCCTGAACAACCC  |
| IS91 fam.2        | GCTTCAGGTGATCAAGGATCTG  |
| <i>floR.1</i>     | ATAGAGGCTCAACGTGAGTTGG  |
| <i>floR-2</i>     | CCAACTCACGTTGAGCCTCTAT  |
| IS6 fam           | GCCCTTGAAATCATCCTTCGAC  |
| <i>aac(3)-IVa</i> | TCCTGAAGAATGGTGCAGTGTC  |
| DUF 1819 fam      | AGGCAGCTTCATCAAGCTCTTG  |
| <i>drfA14.1</i>   | CAGAAGCCACTGATTGTAGGTC  |
| <i>drfA14.2</i>   | GACCTACAATCAGTGGCTTCTG  |
| IS3 fam           | CACACCAAACACGTGCTGTATC  |
| <i>aph(3')-Ia</i> | ACCATGAGTGACGACTGAATCC  |
| MFS-trans-flq     | GTGTACGTCGGGTAATCATCTG  |
